# Supplementary material for: The Recombination of Insertion Sequence Results in Deletion of the 3′ End of the <em>cry1Ac</em> Gene with Concomitant Enhancement of Its Insecticidal Activity
Source: Preprints.org preprint supplement (doi:10.20944/preprints202405.0787.v1), 2024-05-13
Supplement: Supplementary file 1 [file supplementary]

## Sheet: Sheet1
Table S1. Primers used in this study
Use	Primers	Sequences	Length	Source
RACE	R7569-2387F1	GTGGAGAGCCTAACAGATGC		RACE（gsp1）
	R7569-2426F2	ATCCTGACTTGGACTGCTCC	500bp	RACE（gsp2）
Detection of flanking sequences	531-GF	GAAAGAACTAAACAATTAGTACCC	615N/529C	Yang, 2016
	531-TR	CTCGCACACGGCTTCGAC
	531-GR	AAACCAATGCCACCCCACTG
Detection of full cry1Ac sequences	cry1Ac-F	GATGTACTGACCTGAATGAG	1545bp	This study
	cry1Ac-R	ACAATCTGATCCCAGCTTGC
Verification of full cry1Ac sequences	Full length-1F	GAAAGAACTAAACAATTAGTACCC	3103bp	This study
	Full length-1R	AATGAAACCTTAACGCTATG
	Full length-2F	CCTCGTGCTTTACGGTATCG	2732bp
	Full length-2R	CGATCAGCCTAGTAAGGTCGT
	Full length-3F	ATGGACAACAACCCAAACATCAACG	2731bp
	Full length-3R	AAATTGTCACGGTCTACCAG
	Full length-4F	GATGTACTGACCTGAATGAG	625bp
	Full length-4R	GAACCTTCATCGTGGACAGC
	Full length-5F	ACAATCTGATCCCAGCTTGC	1434bp
	Full length-5R	AAACCAATGCCACCCCACTG
Quantitative Detection Assay for R7569	DBQ-QF	GATGTACTGACCTGAATGAG	172bp	This Study
	DBQ-QR	GACTGACAAGATCGATCTGAAGTCTA
	DBQ-QP	FAM-TCTTCAAGACCCAAGGCGGG- BHQ1
	ACP1-QF	ATTGTGATGGGACTTGAGGAAGA	76bp	This Study
	ACP1-QR	CTTGAACAGTTGTGATGGATTGTG
	ACP1-QP	HEX-ATTGTCCTCTTCCACCGTGATTCCGAA-BHQ1
